# Supplementary material
Source: publisher figshare collection journal article supplement (https://acs.figshare.com/ndownloader/files/10279650)
Supplement: Supplementary file 1 [file 10279650]

## Supporting Information

### Engineered Phage Matrix Stiffness-Modulating Osteogenic Differentiation

Hee-Sook Lee,<sup>1,2,†</sup> Jeong-In Kang,<sup>3,4,5†</sup> Woo-Jae Chung,<sup>6</sup> Do Hoon Lee,<sup>7</sup> Byung Yang Lee,<sup>7</sup> Seung-Wuk Lee<sup>1,\*</sup> and So Young Yoo<sup>3,4,\*</sup>

<sup>1</sup>Bioengineering, University of California, Berkeley, Lawrence Berkeley National Laboratory, Berkeley, CA 94720, USA

<sup>2</sup>Ministry of Food and Drug Safety, Center for Test and Analysis, Busan 48562

<sup>3</sup>BIO-IT Foundry Technology Institute, Pusan National University, Busan 46241, Republic of Korea

<sup>4</sup>Research Institute for Convergence of Biomedical Science and Technology, Pusan National University Yangsan Hospital, Yangsan 50612, Republic of Korea

<sup>5</sup>Control and Instrumentation Engineering, Korea Maritime and Ocean University, Busan 49112, Republic of Korea

<sup>6</sup>Genetic Engineering, Sungkyunkwan University, Suwon 16419, Republic of Korea

<sup>7</sup>Mechanical Engineering, Korea University, Seoul 02841, Republic of Korea

†First authors

\*Corresponding authors: leesw@berkeley.edu (Seung-Wuk Lee)

yoosy2@gmail.com and yoosy@pusan.ac.kr (So Young Yoo)

**Table S1. Phage concentrations used for the self-templating assembly and the estimated areal phage density for the observed structures estimated from the phage films.<sup>1</sup>**

| <b>Self-templated structure</b> | <b>Initial concentration (mg/mL)</b> | <b>Initial concentration (number of phages/mL)</b> | <b>Phage density in the resulting film (number of particles/cm<sup>2</sup>)</b> |
|---------------------------------|--------------------------------------|----------------------------------------------------|---------------------------------------------------------------------------------|
| Nematic stripe pattern          | 0.1–0.2                              | $3.2\text{--}6.4 \times 10^{12}$                   | $4.9\text{--}6.5 \times 10^{10}$                                                |
| Cholesteric helical ribbon      | 0.2–0.5                              | $6.4\text{--}16 \times 10^{12}$                    | $6.2\text{--}9.8 \times 10^{10}$                                                |
| Nematic orthogonal twist        | 0.2–1.5                              | $0.64\text{--}4.8 \times 10^{13}$                  | $0.65\text{--}4.2 \times 10^{11}$                                               |
| Smectic helicoidal nanofilament | 4–6                                  | $1.3\text{--}2.0 \times 10^{14}$                   | $1.9\text{--}2.9 \times 10^{12}$                                                |

**Table S2. Primer sequences for pVIII, pIII, and pVII engineering.**

| Name   | Oligonucleotide primer sequence*                                                                                                 | Insert Peptide sequence**       |
|--------|----------------------------------------------------------------------------------------------------------------------------------|---------------------------------|
| p8-fw  | 5' ATATAT <b>CTGCAG</b> <i>NK (NNK)<sub>2</sub> CGTGGT GAT</i>                                                                   | <i><u>AXXXRGDXXDP</u></i>       |
| RGD    | <i>(NNK)<sub>2</sub> GATCCCGCAAAAGCGGCCTTTA ACTC CC</i><br>3'                                                                    | <i><u>ADSGRGDTEDP</u></i> ***   |
| p8-fw  | 5' ATATAT <b>CTGCAG</b> <i>NN GGC CGT GGC GAT TCT</i>                                                                            | <i><u>AGGRGDSDDYDP</u></i> ***  |
| RDD    | <i>GAT GAC GAT</i><br>GATCCCGCAAAAGCGGCCTTTAACT<br>CCCTGCAAGCC 3'                                                                |                                 |
| p8-REV | 5' CCT <b>CTGCAG</b> CGAAAGACAGCATCGG 3'                                                                                         |                                 |
| p3-FWD | 5' AAACACT <b>CGGCCG</b> AAAGTGTGAAAGT<br>TGTTTAGC 3'                                                                            |                                 |
| p3-rev | 5' TATATA <b>CGGCCG</b> A <i>TCCACCGCCGCACG</i><br><i>GCGGGCCCTGCGGATGGCACGC</i><br>CGAGTGAGAATAGAAAGGAACCACTAAAG<br>GAATTGCG 3' | SHS <i><u>ACHPQGPLCGGGA</u></i> |
| P7-Fwd | 5' ATATAT <b>GGATCC</b>                                                                                                          |                                 |
| HPQ    | ATGGAGTGCNNKCATCCGCAGNNKTGTGTCGCG<br>GATTCGACACAATTTATCAG 3'                                                                     |                                 |
| P7-REV | 5' AAACAC <b>GGATCC</b> GTTACTTAGCCGGAACGAGG<br>CGCAGACGGT 3'                                                                    | ME <i><u>CLHPQTCV</u></i>       |

\* For primer oligonucleotide sequences, the restriction sites are indicated in **bold** and the insert is underlined and italicized.

\*\* For the resulting peptide sequence, the insert is underlined and italicized.

\*\*\* Constructed using the partial library approach;<sup>2</sup> selected sequence indicated.

**Table S3. Phage cloning polymerase chain reaction (PCR) conditions.**

| PCR ingredients                                   | pVIII PCR conditions | pIII or pVII PCR conditions |
|---------------------------------------------------|----------------------|-----------------------------|
| ~25 ng dsDNA template*                            |                      |                             |
| 2.5 µL 10 µM forward primer                       |                      |                             |
| 2.5 µL 10 µM reverse primer                       |                      |                             |
| 1 µL dNTP (10 mM mixture of A, T, G, and C bases) | 98 °C 1 min          | 98 °C 1 min                 |
| 1 µL DMSO                                         | / 98 °C 15 s         | / 98 °C 15 s                |
| 10 µL 5X HF Phusion Polymerase buffer             | 25x < 58 °C** 20 s   | 25x < 61 °C 20 s            |
| Balance with sterile H <sub>2</sub> O to 50 µL    | \ 72 °C 3 min 30 s   | \ 72 °C 3 min 30 s          |
| 1 µL Phusion polymerase Enzyme                    | 72 °C 4 min          | 72 °C 4 min                 |
|                                                   | 4 °C ∞               | 4 °C ∞                      |

\* ~1 µL; use any template that has a PstI site for pVIII M13 engineering the EagI and the BamHI sites for pIII and pVII M13 engineering

\*\* Primer annealing temperature = Primer T<sub>m</sub> (lower of the two primers) – 2

**Table S4. Primer sets for mouse osteoblast cell markers.<sup>3</sup>**

| Name                                 |          | Sequence 5-3                     | Length<br>(bp) |
|--------------------------------------|----------|----------------------------------|----------------|
| Collagen pro-alpha-1<br>type I chain | COL I-Fw | 5' GGAGAGAGCATGACCGATGGA 3'      | 102            |
|                                      | COL I-Re | 5' GGTGGACATTAGGCGAGGAA 3'       |                |
| Osteopontin                          | OP-Fw    | TGAAAGTGACTGATTCTGGCA            | 375            |
|                                      | OP-Re    | GGACGATTGGAGTGAAAGTGT            |                |
| Alkaline phosphatase                 | ALP-Fw   | 5' CCA GCA GGT TTC TCT CTT GG 3' | 239            |
|                                      | ALP-Re   | 5' CTG GGA GTC TCA TCC TGA GC 3' |                |
| Osteocalcin                          | OCN-Fw   | 5' CTC ACT CTG CTG GCC CTG 3'    | 257            |
|                                      | OCN-Re   | 5' CCG TAG ATG CGT TTG TAG GC 3' |                |
| Dentin matrix protein 1              | Dmp I-Fw | 5' CCC AGA GGC ACA GGC AAA TA 3' | 211            |
|                                      | Dmp I-Re | 5' TCC TCC CCA CTG TCC TTC TT 3' |                |
| β-Actin                              | BAT-Fw   | GTCCCTCACCTCCCAAAG               | 266            |
|                                      | BAT-Re   | GCTGCCTCAACACCTCAACCC            |                |

**Table S5. Primer sets for human osteoblast cell markers.**

| Name                                 |    | Sequence 5-3            | Length<br>(bp) |
|--------------------------------------|----|-------------------------|----------------|
| Runx2                                | FW | CCACCACTCACTACCACACC    | 70             |
|                                      | RE | AAGGGTCCACTCTGGCTTTG    |                |
| Alkaline phosphatase<br>(ALP)        | FW | CTATCCTGGCTCCGTGCTCC    | 100            |
|                                      | RE | GCTGGCAGTGGTCAGATGTT    |                |
| Osteopontin<br>(OP)                  | FW | CGAGGTGATAGTGTGGTTTATGG | 128            |
|                                      | RE | GCACCATTCAACTCCTCGCTTTC |                |
| Osteocalcin<br>(OCN)                 | FW | CAAAGGTGCAGCCTTTGTGTC   | 150            |
|                                      | RE | TCACAGTCCGGATTGAGCTCA   |                |
| Collagen pro-alpha-1<br>type I (COL) | FW | CTGGCAGCCCTGGTGAAA      | 114            |
|                                      | RE | CACCATCATTTCCACGAGCA    |                |
| $\beta$ -Actin                       | FW | AGAGCTACGAGCTGCCTGAC    | 184            |
|                                      | RE | AGCACTGTGTTGGCGTACAG    |                |

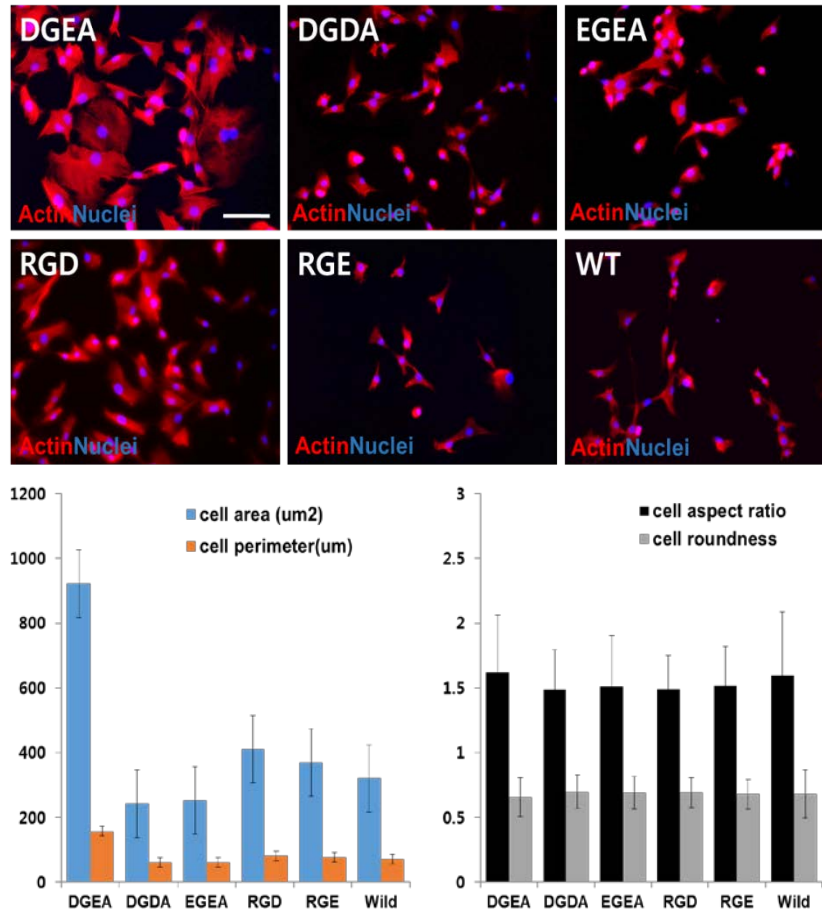

**Figure S1. Morphological analysis of MC3T3 preosteoblast cells on different phages (DGEA, DGDA, EGEA, RGD, RGE-displaying or wild-type phages).** Fluorescent microscopy image of preosteoblast on different type of phage matrices (Up, Actin was stained with phalloidin (red) and nucleus was stained with DAPI (blue). Scale bar = 100 μm). The bar graph shows the quantification of area, perimeter, AR, and roundness of cells on each phage (Bottom, Two to three fields of views were taken to analyze each image. cell  $n=5$  per one field of view).

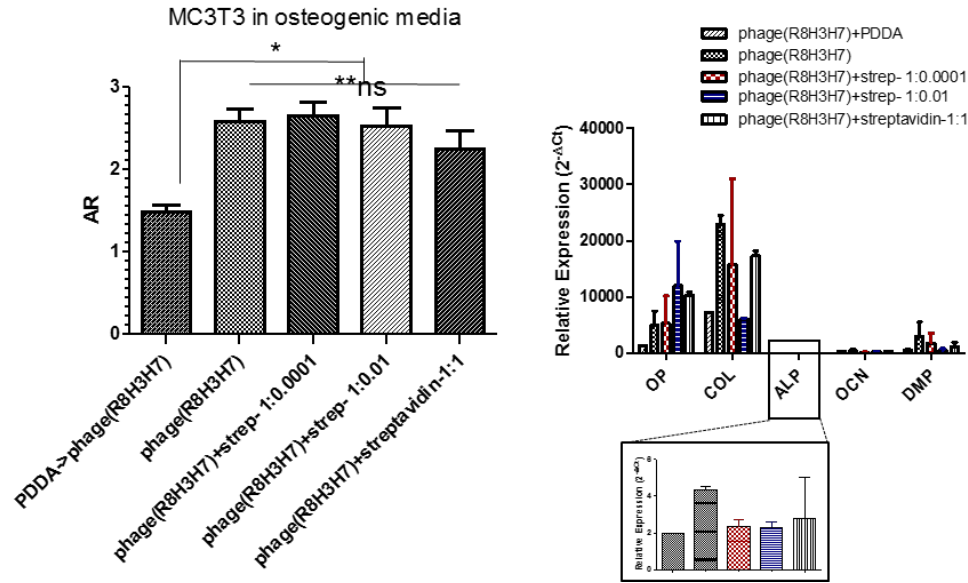

**Figure S2. Morphology of preosteoblasts on top of different phage matrixes (left) and quantitative osteogenic differentiation marker expression of the cells on the different stiffness ranged phage matrix (right) in osteogenic differentiation media.** With osteogenic induction media, there was no significant difference in AR (left) and osteogenic marker expression (right) of MC3T3s on the different stiffness ranged phage matrix (phage only, phage+strep-1:0.0001, phage+strep-1:0.01 and phage+strep-1:1, Most of them have about 2.5 of ARs at 24h culture; \*\*ns  $p > 0.05$ , ANOVA) whereas ARs of MC3T3 on phage matrix with low stiffenss (3-6kPa, phage+PDDA) are around 1.5 (\* $p < 0.05$  vs phage(R8H3H7) phage matrix,  $t$ -test). Two to three fields of views were taken to anlyaze each images. cell  $n = 10$  per one filed of view.



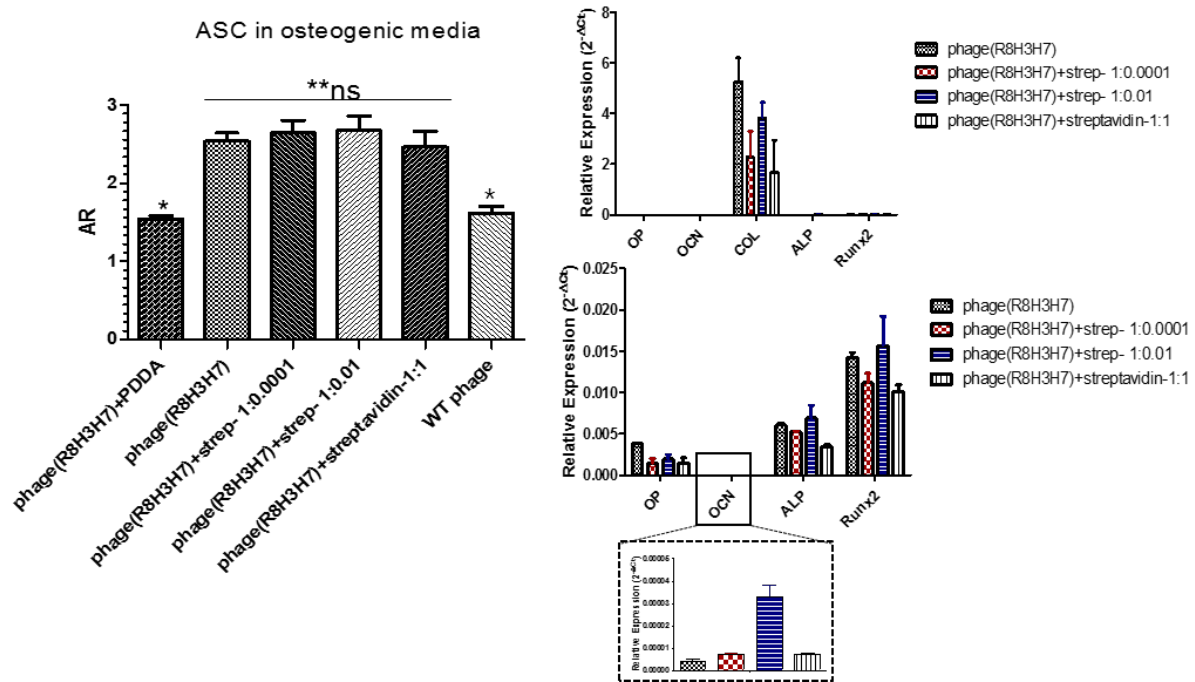

**Figure S3. Morphology of human adipose-derived stem cells (ASCs) in osteogenic differentiation media on top of different phage matrixes (left) and quantitative osteogenic differentiation marker expression of the cells on the different stiffness ranged phage matrix (right).** With osteogenic induction media, there was no significant difference in AR (left) and osteogenic marker expression (right) of ASCs on the different stiffness ranged phage matrix (phage only, phage+strep-1:0.0001, phage+strep-1:0.01 and phage+strep-1:1, ARs are ~ 2.5 at 24h culture; \*\*ns  $p > 0.05$ , ANOVA) whereas ARs of ASCs on phage matrix with low stiffness (3-6kPa, phage+PDDA) or phage matrix without RGD motif (20-40kPa, WT phage matrix) are around 1.5 (\* $p < 0.05$  vs phage(R8H3H7) phage matrix,  $t$ -test). Two to three fields of views were taken to analyze each images. cell  $n = 10$  per one field of view.

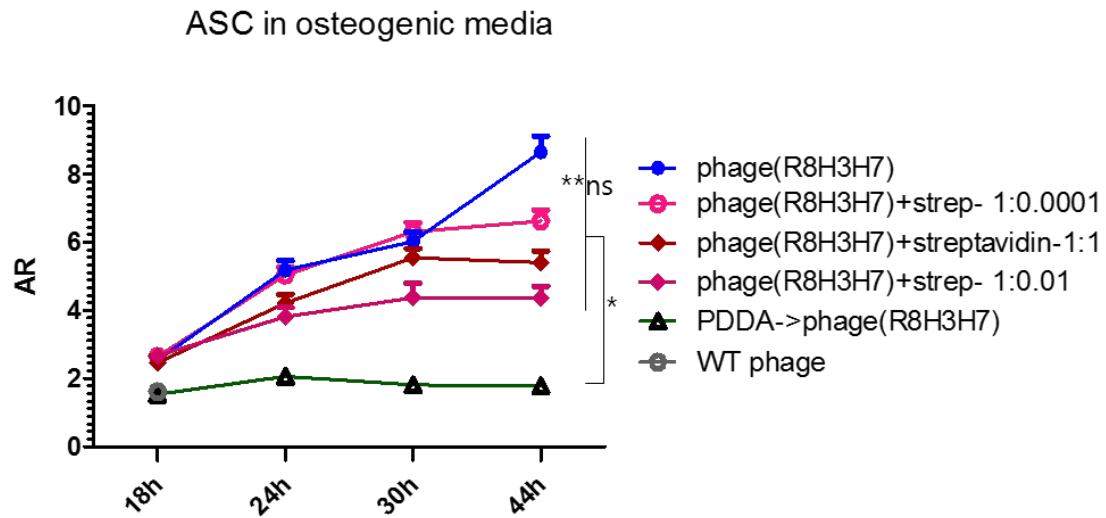

**Figure S4. AR changes of ASCs on the different stiffness ranged phage matrices with osteogenic differentiation media according to the culture time.** There was no significant difference in AR changes of ASCs on the different stiffness ranged phage matrix (phage only, phage+strep-1:0.0001, phage+strep-1:0.01 and phage+strep-1:1; \*\*ns  $p>0.05$ , ANOVA) whereas that of ASCs on phage matrix with low stiffness (3-6kPa, phage+PDDA) are kept as around 1.5 (\* $p<0.05$  vs phage(R8H3H7) matrix with stiffness ranges of higher than 20 kPa,  $t$ -test). Two to three fields of views were taken to analyze each images. cell  $n=10$  per one field of view.

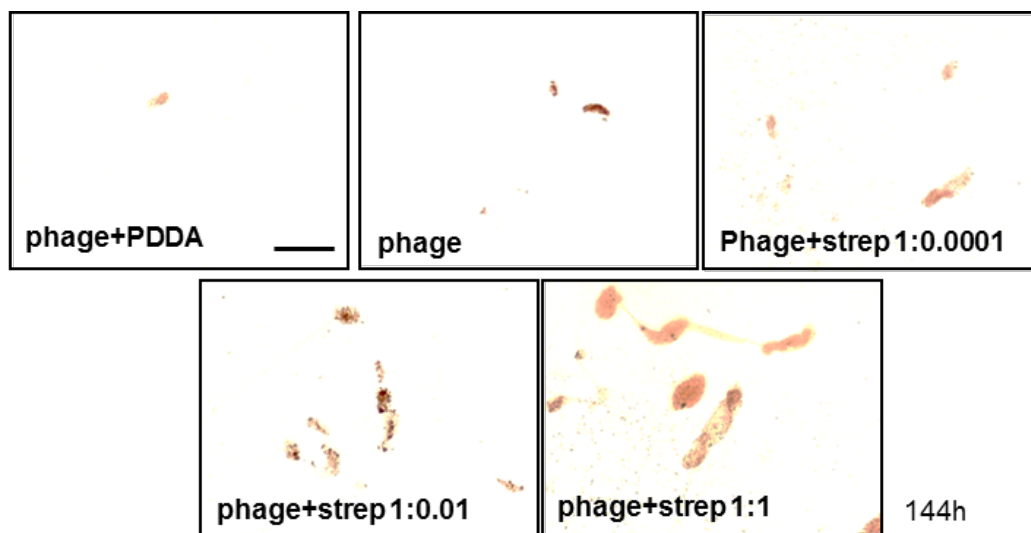

**Figure S5. Alizarin Red staining of ASCs on the different stiffness ranged phage matrices with osteogenic differentiation media for 144h.** Correlation between mineralization and phage matrix stiffness is apparently observed with Alizarin Red staining of ASCs on the different stiffness ranged phage matrix even at 144h culture (at 6 day, phage+strep 1:1 > phage+strep 1:001 > phage+strep 1:0.0001 > phage only > phage+PDDA, Scale bar = 20  $\mu$ m).

## References

- (1) Chung, W.-J.; Oh, J.-W.; Kwak, K.; Lee, B. Y.; Meyer, J.; Wang, E.; Hexemer, A.; Lee, S.-W. Biomimetic self-templating supramolecular structures. *Nature* **2011**, 478 (7369), 364-368, DOI: 10.1038/nature10513.
- (2) Merzlyak, A.; Indrakanti, S.; Lee, S. W. Genetically engineered nanofiber-like viruses for tissue regenerating materials. *Nano Lett* **2009**, 9 (2), 846-52, DOI: 10.1021/nl8036728 10.1021/nl8036728 [pii].
- (3) Yoo, S. Y.; Kobayashi, M.; Lee, P. P.; Lee, S. W. Early osteogenic differentiation of mouse preosteoblasts induced by collagen-derived DGEA-peptide on nanofibrous phage tissue matrices. *Biomacromolecules* **2011**, 12 (4), 987-996, DOI: 10.1021/bm1013475.
